# Supplementary material
Source: publisher figshare collection journal article supplement (https://aacr.figshare.com/articles/dataset/_/22363668)

Regl et al., suppl. Figure 2

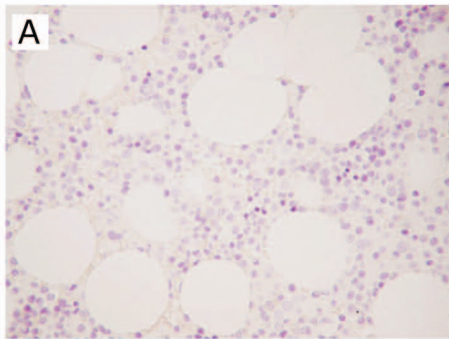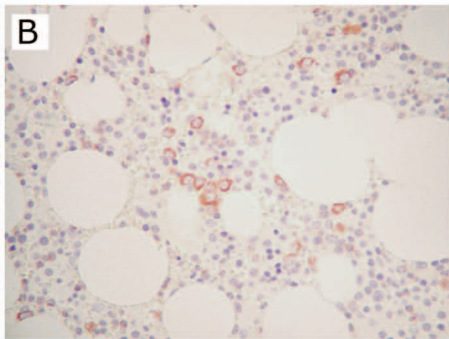

Supplement: Supplementary file 1 [file 39807879]
